# Supplementary material
Source: PubMed Central journal article supplement (PMC3088122)

# Supplemental Material: All User Data

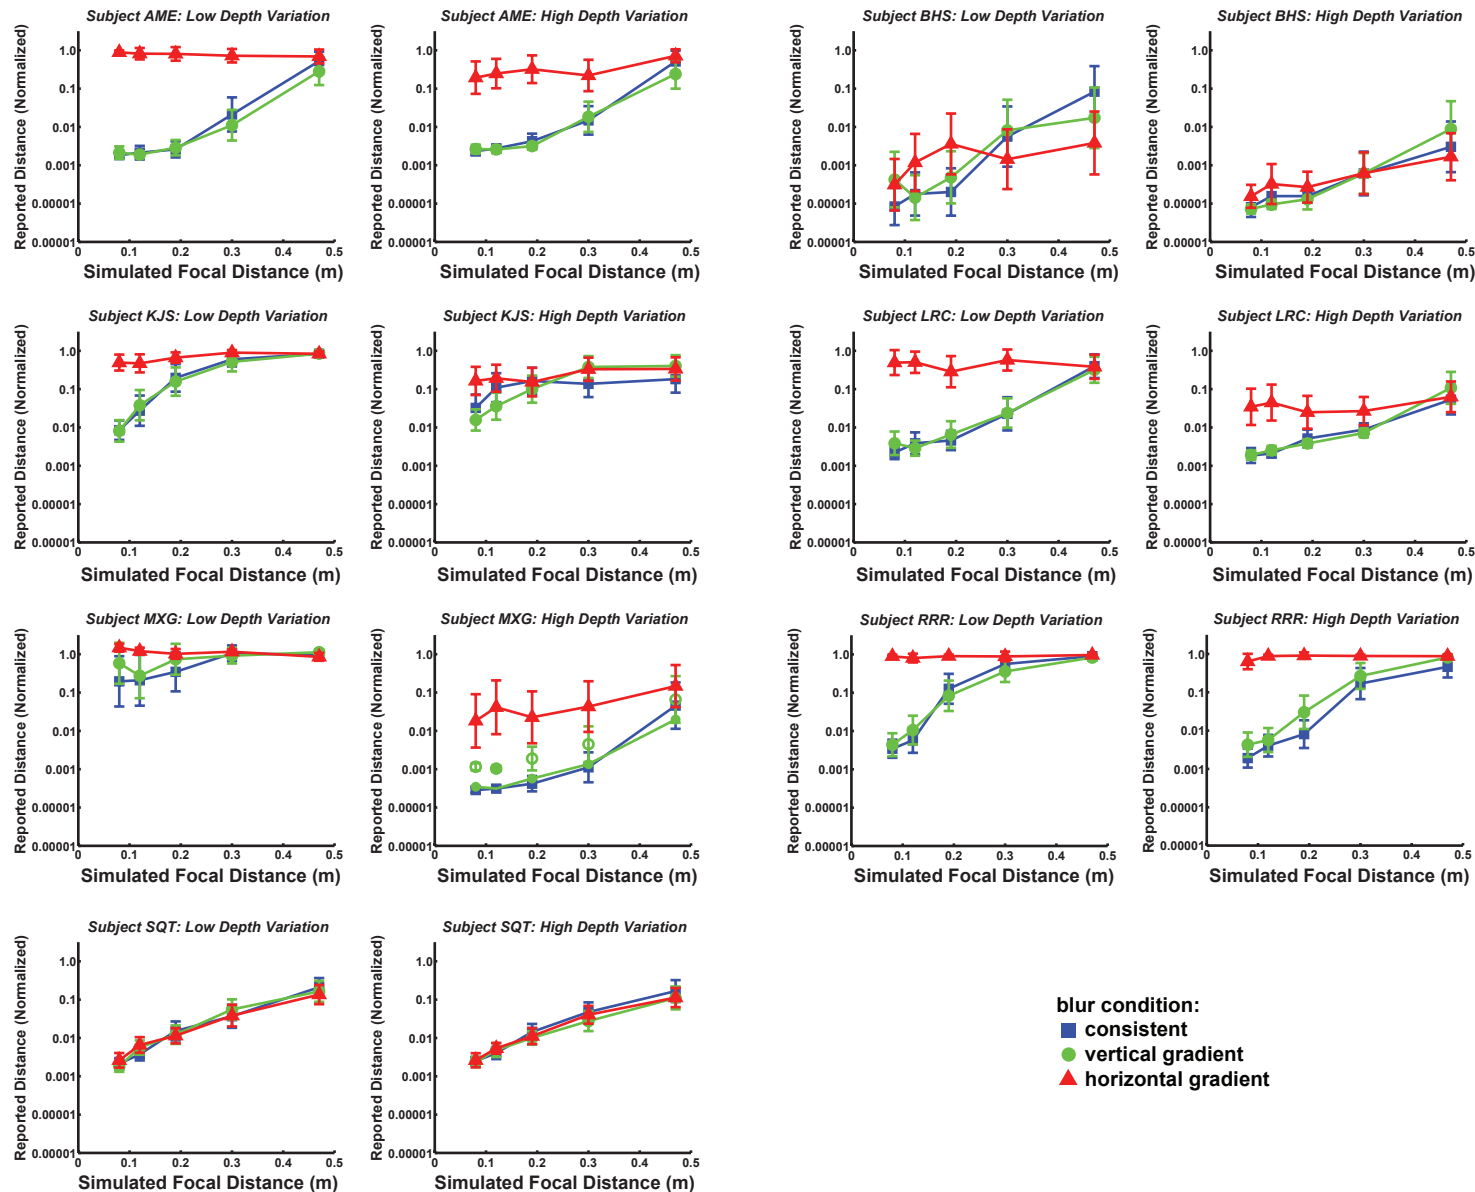

Supplement: NIHMS202277-supplement-Supplementary_Data.pdf [file NIHMS202277-supplement-Supplementary_Data.pdf]
